# Supplementary material for: Vitamin D Improves Neurogenesis and Cognition in a Mouse Model of Alzheimer’s Disease
Source: PubMed Central journal article supplement (PMC6061182; doi:10.1007/s12035-017-0839-1), 2018-01-09

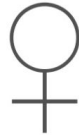

**A** Effect of an early supplementation on working memory

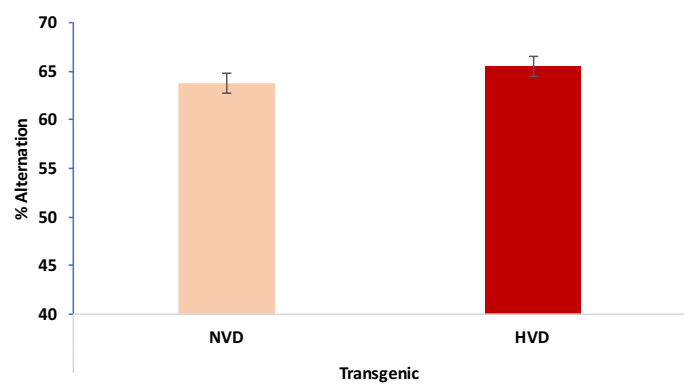

**B** Effect of a late supplementation on working memory

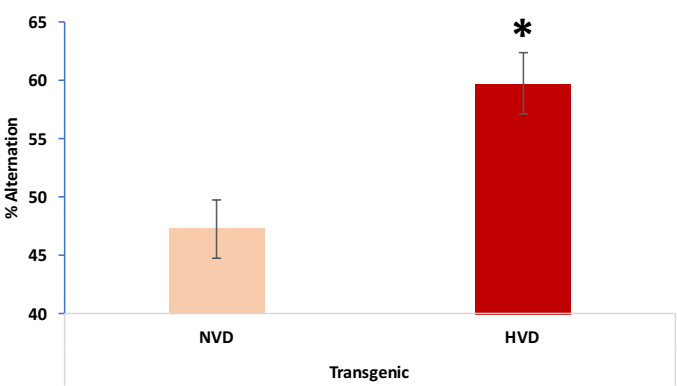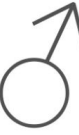

**C** Effect of an early supplementation on working memory

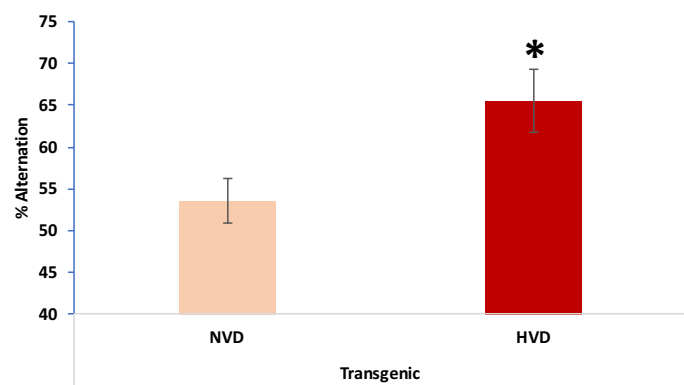

**D** Effect of a late supplementation on working memory

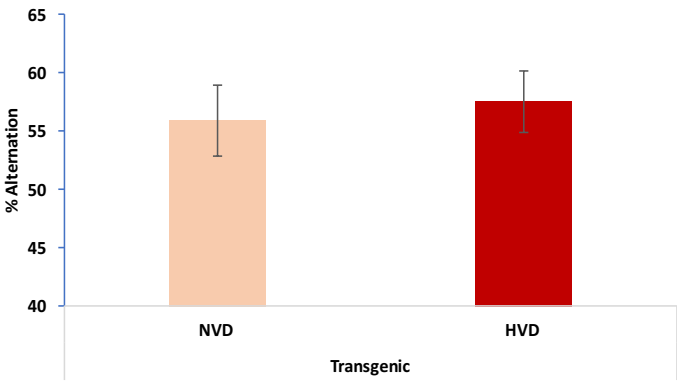

Supplement: 12035_2017_839_MOESM1_ESM.pdf [file 12035_2017_839_MOESM1_ESM.pdf]
