# Supplementary material for: Vitamin D Improves Neurogenesis and Cognition in a Mouse Model of Alzheimer’s Disease
Source: PubMed Central journal article supplement (PMC6061182; doi:10.1007/s12035-017-0839-1), 2018-01-09

**A** Effect of calcitriol on differentiation:  
neurosphere shape and adhesion

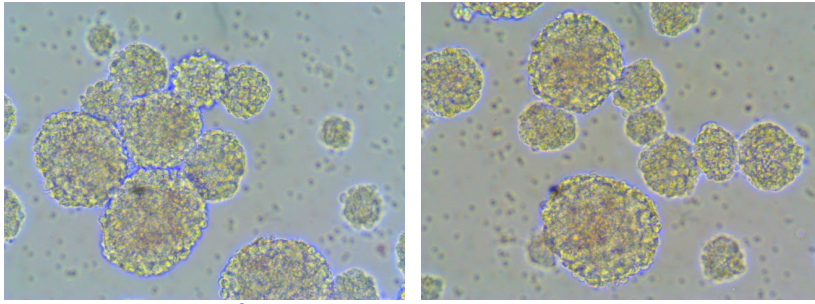

**Control**

**Vitamin D**

**B** Effect of calcitriol on differentiation:  
cell cycle of neurospheres

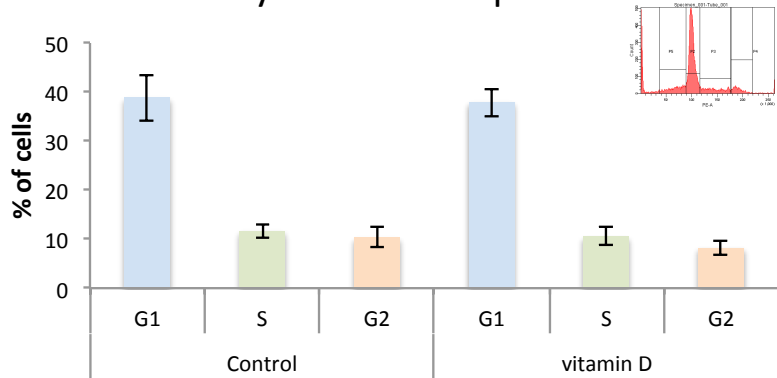

**C**

Transcription of VDR during differentiation of primary cultures of neuroblasts

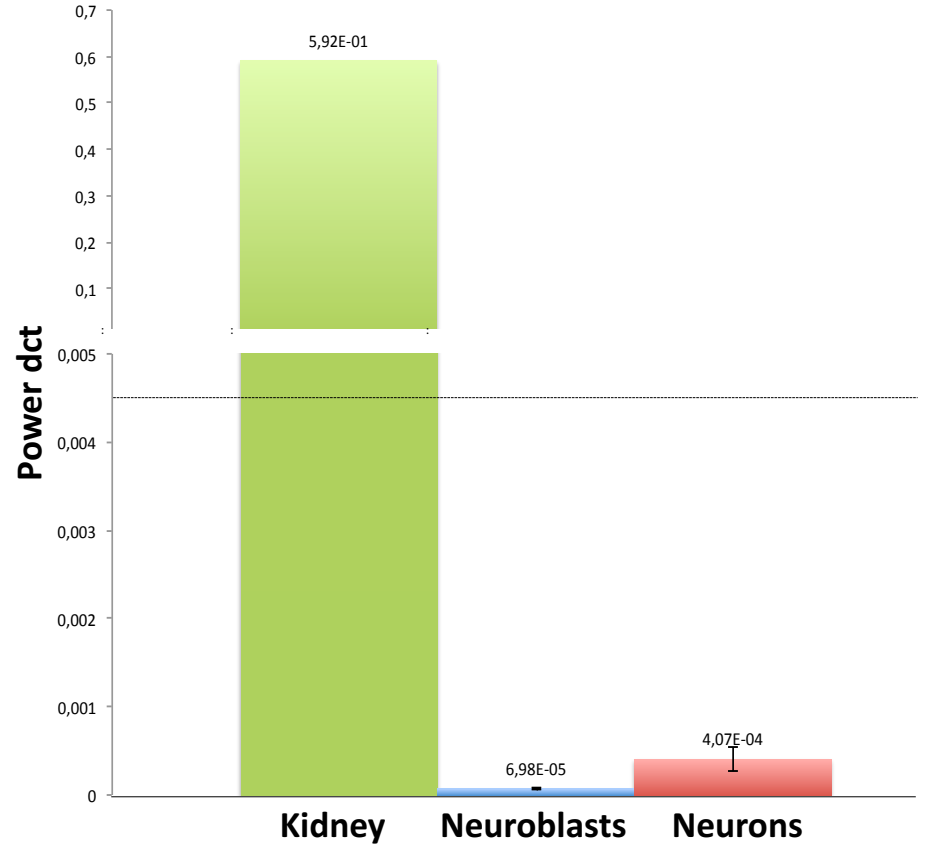

Supplement: 12035_2017_839_MOESM2_ESM.pdf [file 12035_2017_839_MOESM2_ESM.pdf]
